# Supplementary material
Source: PubMed Central journal article supplement (PMC6261851)
Supplement: 10680_2017_9463_MOESM1_ESM.pdf [file 10680_2017_9463_MOESM1_ESM.pdf]

## Online Appendix 1. Questions used to fill the Life History Calendar

### Residential grid

We are now going to review in detail all the different dwellings you lived in for more than a year IN FRANCE. Some of these dwellings may be in the same city.

- When you arrived in France, did you live more than a year in the same dwelling or have you frequently changed dwellings?
- When you arrived in France, the dwelling where you lived was in which administrative region / French “département”?
- When you settled in this dwelling:
  1. It was your own home.
  2. You were hosted by your family (with or without financial support).
  3. You were hosted by another person (s) close to you (with or without financial support).
  4. Other to (specify).
- How long did you stay in this dwelling?
- And then did you live more than a year in the same dwelling or have you frequently changed dwellings?

### Legal-status history grid

The issue of papers can influence the possibilities that one has to live and work in a country. That is why I would like to try and trace with you the different types of papers ,residence permits you may have had or not living in France. Can we try and trace all that together?

When you arrived in France, what administrative document did you have?  
Visa / no visa / no visa requirement / Other

And then what kind of document did you get?

- Temporary residence authorisation or receipt: TS <1year
- Temporary residence permit: TS 1-3 years
- Residence permit: 10 years TS
- No residence permit: No TS
- No need for a residence permit: No need TS
- Other => Specify

And then did your situation change?

What year did it change? What type of document did you get then?

And then did your situation change?

### Activities & resources grid

We are now going to talk about the different periods of activities since your childhood: school, studies, vocational training, work, home or unemployment, etc. Let's talk about the activities that have lasted at least a year.

- What were you doing when you were 6 years old? What was your main activity? How long did you continue to [adapt] to go to school / help at home ... ?
- And then what did you do? And until when?

In this activity you were ...?

1. Manager (middle management)
2. Employee or worker
3. Boss, employer
4. Self-employed (without employees)
5. Apprentice, trainee
6. Caregiver

- What type of contract did you have?

1. CDI (Contract of Indeterminate Duration)
2. CDD (Contract of Determinate Duration)
- 3 - No contract

- And then what did you do? And until when?

Can we see together where your financial resources have been coming from at different times of your life?

- At what age did you have other resources than those of your parents?
- Where did these resources come from?

1. Your own activity
2. The activity of your spouse/partner
3. Activities of other family members
4. State grants, specify (scholarship, family allowance, disability or invalidity allowance ...)
5. No resources
  - How long did you have this type of resource?
  - And then what did you have as resources? And until when?
